# Supplementary material
Source: ML conference proceedings conference paper supplement (https://openreview.net/forum?id=-eHlU74N9E)
Supplement: supplementary_material [file attachment]

## A Example and Analysis for Algorithm 1

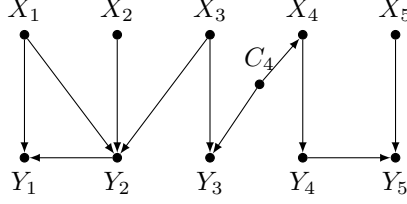

Figure 11: An interaction network of 5 individuals.

**Example 2.** Input:  $t = 3$ , interaction network in Figure 11.

Iteration 1: Units = [1, 5, 4, 2, 3].  $B = \{5, 2\}$ .

Iteration 2: Units = [5, 1, 4, 3, 2].  $B = \{5, 3\}$ .

Iteration 3: Units = [5, 2, 3, 1, 4].  $B = \{5, 2\}$ .

The three choices of  $B$  all have the same size 2. So the output is any of the three choices of  $B$ .

Note that the subnetwork formed by 5 and 3 contains a bidirected path between  $Y_3$  and  $Y_5$  (due to the path  $Y_3 \leftarrow C_4 \rightarrow X_4 \rightarrow Y_4 \rightarrow Y_5$ ), and this does not constitute a bias structure.

**Complexity Analysis** The time complexity is  $O(tn^2d^p)$ .  $d$  is the maximum degree of each node (how many other nodes a node is directly connected to), and  $p$  is the length (number of edges) of the longest simple path. This is polynomial if the degree is bounded.

**Lemma 2.** The following two statements are equivalent. The first statement is used in this algorithm for simpler computation, and the second statement is used in the main text for easier understanding.

1. For each individual  $i$  in  $B$ ,  $i$  has no deflecting bias structure in  $G^*$  with another individual  $j$  in  $B$ .
2. For each individual  $i$  in  $B$ ,  $i$  has no deflecting bias structure in the latent projection of  $G^*$  on  $B$ .

The definition of latent projection is by Pearl [2009], as follows.

**Definition 9** (Projection[Pearl, 2009]). A latent structure  $L_{[O]} = \langle D_{[O]}, O \rangle$  is a projection of another latent structure  $L$  if and only if:

1. every unobservable variable of  $D_{[O]}$  is a parentless common cause of exactly two nonadjacent observable variables; and
2. for every stable distribution  $P$  generated by  $L$ , there exists a stable distribution  $P'$  generated by  $L_{[O]}$  such that  $I(P_{[O]}) = I(P'_{[O]})$ .

*Proof of Lemma 2.*

*Proof.* If statement 1 is false, then there exists an open path between  $X_i$  and  $Y_j$  in  $G^*$ , where  $i, j \in B$ . The latent projection contains both  $i$  and  $j$  so the open path still exists, which implies a deflecting bias structure in the latent projection.

If statement 2 is false, then there exists an open path between  $X_i$  and  $Y_j$  in the latent projection. This implies a deflecting bias structure in  $G^*$ .  $\square$

## B An Additional Simulation

**Experiment: Subset Size of THM-2** We use same parameter settings as the previous experiment, except that we let  $dRate$  and  $rRate$  vary in 0.01, 0.1, 0.3, 0.5. The subset sizes selected by THM-2 are in Table 1. Observe that as the graph gets denser (larger  $dRate$  and  $rRate$ ), THM-2 is unable to

use most of the input samples. However, for the tests with samples  $\geq 3$ , THM-2 yields very accurate estimates. Given that the ground truth is 100, **the estimates of THM-2 range between 99.96 and 100.06.**

|              |      | <i>dRate</i> |     |     |     |
|--------------|------|--------------|-----|-----|-----|
|              |      | 0.01         | 0.1 | 0.3 | 0.5 |
| <i>rRate</i> | 0.01 | 155          | 147 | 131 | 115 |
|              | 0.1  | 26           | 24  | 23  | 23  |
|              | 0.3  | 9            | 8   | 8   | 8   |
|              | 0.5  | 5            | 4   | 3   | 0   |

**Table 1:** Each cell denotes the subset size selected using THM-2.

## C Proof of the Theorems

All lemmas and proofs are attached in Section D of the appendix.

**Theorem 1.** Let  $M^*(G^*, S^*)$  be a balanced interaction model in which treatment variable  $X_i$  and outcome variable  $Y_i$  are not confounded by any variable in  $\mathcal{V}_i$ ,  $\forall i$ . Let  $D$  be the available data generated by  $M^*$  and let  $G^\dagger$  be the approximate graph constructed using  $D$ . Let  $TACE_{XY}$  be identifiable in  $G^\dagger$  and be given by  $\beta_{YX}$ , the regression coefficient of  $Y$  on  $X$ . Let  $\alpha$  denote the true value of  $TACE_{X,Y}$  in  $M^*$ . If  $X$  satisfies ASDC then the interaction bias is given by,

$$\left| E[\hat{\beta}_{YX}] - \alpha \right| = \left| \frac{1}{n} \sum_{1 \leq i \leq n} \sum_{p \in P[iji]} Val(p) \frac{\sigma_{R_p}^2}{\sigma_X^2} - \frac{1}{n(n-1)} \sum_{1 \leq i \leq n} \sum_{p \in P[ji]} Val(p) \frac{\sigma_{R_p}^2}{\sigma_X^2} \right|,$$

where  $P[iji]$  is the set of reflecting bias structures between  $X_i$  and  $Y_i$  through any explicit variable  $W_j$  of unit  $j$  with  $i \neq j$ ,  $P[ji]$  is the set of deflecting bias structures between  $X_j$  and  $Y_i$  with  $i \neq j$ , and  $R_p$  is the root of path  $p$ .

*Proof.* By Lemma 9,

$$\begin{aligned} & E[\hat{\beta}_{YX}] \\ &= \alpha \\ &+ \frac{1}{n} \left( \sum_{p \in \mathcal{P}} Val(p) + \sum_{1 \leq i \leq n} \sum_{R \in (\mathcal{R}[iji] \setminus \{X_i\})} c_R \beta_{RX} \right) \\ &- \frac{1}{n(n-1)} \sum_{1 \leq i \leq n} \sum_{R \in \mathcal{R}[ji]} c_R \beta_{RX}, \end{aligned}$$

where  $\mathcal{P}$  is the set of directed paths from  $X_i$  to  $Y_i$  for any  $i$  passing through an intermediate node  $W_j \in \mathcal{V}_{(j)}$ ,  $i \neq j$ ,  $\mathcal{R}[iji]$  is the set of roots of the open paths between  $X_i$  and  $Y_i$  through some  $W_j$  with  $j \neq i$ ,  $\mathcal{R}[ji]$  is the set of roots of the open paths between  $X_j$  and  $Y_i$  for  $j \neq i$ , and  $c_R$  is the sum of values of the directed paths from a variable  $R$  ( $\in (\mathcal{R}[iji] \setminus \{X_i\})$  or  $\in \mathcal{R}[ji]$ ) to  $Y_i$  not passing through any variable in  $\mathcal{R}[iji] \cup \mathcal{R}[ji]$  for any  $j \neq i$ .

We prove this is equivalent to

$$\begin{aligned} & E[\hat{\beta}_{YX}] \\ &= \alpha \\ &+ \frac{1}{n} \sum_{1 \leq i \leq n} \sum_{p \in P[iji]} Val(p) \frac{\sigma_{R_p}^2}{\sigma_X^2} \\ &- \frac{1}{n(n-1)} \sum_{1 \leq i \leq n} \sum_{p \in P[ji]} Val(p) \frac{\sigma_{R_p}^2}{\sigma_X^2}, \end{aligned}$$

where  $P[iji]$  is the set of open paths between  $X_i$  and  $Y_i$  through any  $W_j \in \mathcal{V}_{(j)}$  with  $i \neq j$ ,  $P[ji]$  is the set of open paths between  $X_j$  and  $Y_i$  through any  $W_j \in \mathcal{V}_{(j)}$  with  $i \neq j$ , and  $R_p$  is the root of path  $p$ .

We first check the term  $\sum_{R \in \mathcal{R}[ji]} c_R \beta_{RX}$ . For an  $R$  that is the root of a path between  $X_j$  and  $Y_i$ , since  $X$  satisfies ASDC, we must have  $R \in \mathcal{V}_{(j)}$ . Rename it as  $R_j$ . We also have  $\beta_{RX} = \sigma_{RX} / \sigma_X^2$ . By Wright's Rules,  $\sigma_{RX}$  is equal to the sum of open path values between  $R$  and  $X$  times the variance of the root of that path. Recall that  $R \in \text{Anc}(X)$ ,  $X$  satisfies ASDC, so  $R$  satisfies ASDC. So  $\sigma_{RX}$  is equal to the sum of open path values between  $R_j$  and  $X_j$  times the variance of the root of that path. We prove that each term that appears in  $A = \sum_{p \in P[ji]} \text{Val}(p) \frac{\sigma_{R_p}^2}{\sigma_X^2}$  also appears in  $B = \sum_{R \in \mathcal{R}[ji]} c_R \beta_{RX}$ , and there is no extra term.

Each  $R_p$  in  $A$  is a root between  $X_j$  and  $Y_i$  for some  $j \neq i$ , and must be included if it is a root. So we just have to check all the roots between  $X_j$  and  $Y_i$  for some  $j \neq i$ . For each root  $R_p$ , we check where in  $B$  will  $\sigma_{R_p}^2 / \sigma_X^2$  exist. When  $R$  in  $B$  is  $R_p$ , the term containing  $\sigma_{R_p}^2 / \sigma_X^2$  in  $\beta_{RX}$  is the sum of paths from  $R_p$  to  $X_j$  where  $R_p$  is the root, so is the sum of directed paths from  $R_p$  to  $X_j$ . So the term containing  $\sigma_{R_p}^2 / \sigma_X^2$  in  $c_R \beta_{RX}$  is the sum of paths between  $Y_i$  and  $X_j$  through  $R_p$  with 1)  $R_p$  being the root and 2) the sub-path from  $R_p$  to  $Y_i$  does not go through any variable in  $\mathcal{R}[iki] \cup \mathcal{R}[ki]$  for any  $k \neq i$ .

The terms that are left in  $\text{Val}(p) \frac{\sigma_{R_p}^2}{\sigma_X^2}$  to cover in  $B$  are the  $X_j - R_p - Y_i$  paths whose sub-path from  $R_p$  to  $Y_i$  go through some variable in  $\mathcal{R}[iki] \cup \mathcal{R}[ki]$  for any  $k \neq i$ . We just have to go over all types of  $R$  in  $B$ , and see which ones contain  $\sigma_{R_p}^2 / \sigma_X^2$ .

**Case 1:**  $R \in \text{Anc}(R_p)$ . There is no such a path in  $c_R$  or  $\beta_{RX}$ .  $c_R$  does not go through  $R$  since  $R \in \mathcal{R}[ji] c_R \beta_{RX}$ .  $\beta_{RX}$  also does not contain  $\sigma_{R_p}^2$  since  $R \in \text{Anc}(R_p)$ , so  $R_p$  is never a root on any paths between  $R$  and  $X_j$ . Hence  $c_R \beta_{RX}$  does not contain such a path.

**Case 2:**  $R \in \text{Desc}(R_p)$ . Again,  $c_R$  does not contain  $R_p$ . However  $\beta_{RX}$  contains  $\sigma_{R_p}^2$ .  $R_p$  can be a root on some paths between  $R$  and  $X_j$ . Those paths are from  $R_p$  to  $R$  and  $R_p$  to  $X_j$ . Recall that  $c_R$  denotes directed paths from  $R$  to  $Y_i$ . The term that contains  $\sigma_{R_p}^2$  in  $c_R \beta_{RX}$  are the paths between  $X_j$  and  $Y_i$ , that pass through some variable in  $\mathcal{R}[iki] \cup \mathcal{R}[ki]$  ( $R$ ), with  $R_p$  being the root. As a result, this case completely cover the missing term.

**Case 3:**  $R \perp\!\!\!\perp R_p$ . It is easy to derive that in this case,  $c_R \beta_{RX}$  does not contain a path that goes through  $R_p$ . Otherwise  $R$  and  $R_p$  would be dependent.

**Case 4:**  $R$  and  $R_p$  are only connected through common ancestors. In this case, in any path that contains both  $R$  and  $R_p$ ,  $R_p$  will not be the root. Their common ancestors will be the roots. So this case also does not provide any term containing  $\sigma_{R_p}^2 / \sigma_X^2$ .

We have proved that for every  $R_p$  in  $A$ , the coefficient of  $\sigma_{R_p}^2 / \sigma_X^2$  (equal to a sum of those paths in  $P[ji]$  with  $R_p$  being the root) is equal to the coefficient of  $\sigma_{R_p}^2 / \sigma_X^2$  in  $B$ . As stated before,  $A$  and  $B$  have the same set of roots, so they have the same  $\sigma_{R_p}^2 / \sigma_X^2$  terms. So the sum of those terms are equal.

Next, we prove the reflecting bias terms are also equal. Observe that  $\bigcup_{1 \leq i \leq n} P[iji] = \mathcal{P}$ , so we just have to prove that  $\sum_{p \in P[iji]} \text{Val}(p) + \sum_{R \in (\mathcal{R}[iji] \setminus \{X_i\})} c_R \beta_{RX}$  is equivalent to  $\sum_{p \in P[iji]} \text{Val}(p) \frac{\sigma_{R_p}^2}{\sigma_X^2}$ . This can be proven using the exact same reasoning above, so we omit the proof.

Thus, the two expressions for  $E[\hat{\beta}_{YX}]$  are equivalent.  $\square$

**Corollary 1.** Let  $M^{**}(G^{**}, S)$  be a balanced interaction model in which  $X$  satisfies ASDC and TACE is identified as  $\beta_{YX} = \alpha$  in the approximate graph, then interaction bias exists iff  $G^{**}$  contains a reflecting or deflecting bias structure.

*Proof.* (if part) Follows from theorem 1. There are two terms that cause bias in theorem 1 and they can be attributed to the two bias structures.

(only if part) Had there been additional structures that caused bias, then theorem 1 would have had additional terms to account for it. Since theorem 1 has only two bias terms fully accounted for by the two structures, there exist no other structure that creates bias.  $\square$

**Theorem 2.** *Let  $G^*$  be an interaction network. Given the conditions in Theorem 1 and ‘ $B$ ’ a bias-free subset for  $G^*$ ,  $TACE_{XY} = E[\hat{\beta}_{YX}]$  where the regression coefficient is calculated using only samples in set  $B$ .*

*Proof.* We check the interaction network  $G_S^*$  formed by  $B$ , by treating any variable from  $\mathcal{V}_{(j)}$  where  $j \notin S$  as unobserved. Next, we calculate  $E[\hat{\beta}_{YX}]$  for  $G_S^*$ .

By Theorem 1,

$$E[\hat{\beta}_{YX}] = \alpha + \frac{1}{n} \text{Term}_2 - \frac{1}{n(n-1)} \text{Term}_3.$$

The second term is obtained by summing over paths of the form:  $X_i - \dots - W_j - \dots - Y_i$ , and the third term is obtained by summing over paths of the form:  $X_i - \dots - Y_j$ . These paths do not exist in  $G_S^*$ . Hence, the two bias terms are 0, and  $E[\hat{\beta}_{YX}] = \alpha$ .  $\square$

## D Lemmas

**Lemma 1.** *If  $W$  satisfies ASDC, then any two explicit variables  $W_i$  and  $W_j$  are IID (Independent and Identically Distributed.)*

*Proof.* If  $W$  satisfies ASDC, and  $W_i$  is the root for some  $i$ , then from the third property of ASDC,  $W_i$  must be the root for all  $i$ . The roots are only caused by their error terms, the error terms are IID (identically distributed and independent), so  $W$  is IID.

If  $W_i$  is not the root for any  $i$ ,  $W$  satisfies ASDC, and all its parents are IID, then we have for any  $i$

$$W_i = \sum_{V_i \in Pa(W)} c_{V_i} V_i + U_{W_i},$$

where  $c_{V_i}$  is the coefficient of the variable  $V_i$  on the edge  $V_i \rightarrow W_i$ . Each term is IID for any  $i \neq j$ . So  $W_i$  and  $W_j$  are IID.

If  $W_i$  is not the root for any  $i$ ,  $W$  satisfies ASDC, and there exists a parent of  $W$ ,  $V$  such that  $V_i$  and  $V_j$  are not IID. Then from our previous derivation, there exists a parent of  $V$ ,  $V'$ , such that  $V'_i$  and  $V'_j$  are not IID. Keep tracing up until a root variable  $R$ , such that  $R_i$  and  $R_j$  are not IID. However, this violates our derivation in the beginning, that if a variable is the root and satisfies ASDC, it must be IID. We reach a contradiction. Hence, if  $W_i$  is not the root for any  $i$ ,  $W$  satisfies ASDC, then all its parents are IID, and  $W$  is thus IID.  $\square$

**Lemma 3.** *Let  $\mathcal{X} = \{X_1, \dots, X_n\}$  be  $n$  IID random variables where the  $\sigma_X^2 > 0$ , and a random variable  $W_i$ . Among  $\mathcal{X}$ ,  $W_i$  is dependent of  $X_i$  only, and  $W_i = aX_i + b$  where  $a$  and  $b$  are constants. Then the following expectation exists.*

$$E \left[ \frac{(X_i - \bar{X})W_i}{\sum_{1 \leq i \leq n} (X_i - \bar{X})^2} \right].$$

*Proof.* We have to prove that the function  $f(X_1, \dots, X_n, W_i)$  inside of the expectation is bounded. For convenience, rewrite it by plugging in  $W_i = aX_i + b$ .

$$E \left[ \frac{(X_i - \bar{X})(aX_i + b)}{\sum_{1 \leq i \leq n} (X_i - \bar{X})^2} \right].$$

For any  $X_j$  with  $j \neq i$ , the denominator is a quadratic function on  $X_j$ , and the numerator is a linear function of  $X_j$  from the term  $\bar{X}$ . For  $X_i$ , the denominator is a quadratic function on  $X_i$ , and the numerator is a quadratic function on  $X_i$ . Since  $\sigma_X^2 \neq 0$ ,  $X_1, \dots, X_n$  cannot take on the same value, so the denominator is always positive. When considering  $X_i$  as the variable,  $f$  might only go to infinity when  $X_i$  goes to infinity or negative infinity, and same with  $X_j$ .

When considering  $X_i$  as the variable, and  $X_j$  for all other  $j$  as constants, the denominator can be written in the form of  $AX_i^2 + BX_i + C$ , with  $A, B, C$  being constants. Hence, the order (of the polynomial) of the denominator is 2, and the order of the numerator is 2. So the limit of  $f$  when  $X_i$  goes to  $\infty$  or  $-\infty$  is a finite value equal to the ratio of the coefficient of  $X_i^2$  in the numerator divided by the coefficient of  $X_i^2$  in the denominator.

When considering  $X_j$  as the variable, the order of the denominator is 2, and the order of the numerator is 1. So the limit of  $f$  when  $X_i$  goes to  $\infty$  or  $-\infty$  is 0. Hence,  $f$  is bounded.  $\square$

**Lemma 4.** *Given a balanced interaction model  $M^{**}(G^{**}, S^{**})$ , if generic variables  $V$  and  $X$  both satisfy ASDC, and  $dSep(V_i, X_i | \emptyset)$  for all  $i$  in  $G^{**}$ , then*

$$E \left[ \frac{\sum_{1 \leq i \leq n} (X_i - \bar{X}) V_i}{\sum_{1 \leq i \leq n} (X_i - \bar{X})^2} \right] = 0.$$

*Proof.* The d-separation condition implies  $X_i \perp\!\!\!\perp V_i$ .  $V$  and  $X$  are IID implies that we can treat all  $X_i$ 's as the same variable  $X$ , and treat all  $V_i$ 's as the same variable  $V$ . Hence,  $X \perp\!\!\!\perp V$  and  $\sigma_{XV} = 0$ , which gives  $\beta_{VX} = \sigma_{XV} \sigma_X^{-2} = 0$ . Also note that

$$\hat{\beta}_{VX} = \frac{\sum_{1 \leq i \leq n} (X_i - \bar{X}) V_i}{\sum_{1 \leq i \leq n} (X_i - \bar{X})^2}.$$

Since the ordinary least squares estimator is unbiased, we have  $E[\hat{\beta}_{VX}] = \beta_{VX} = 0$ .  $\square$

**Lemma 5.** *Given a balanced interaction model, with the following conditions: 1)  $X_i$  and  $Y_i$  are not confounded by a path containing only variables in  $\mathcal{V}_i$ ,  $\forall i$ , and 2)  $X_i$  satisfies ASDC. Then there exists a set  $S$  consisting of the following three subsets of explicit variables:*

1.  $S_1$ :  $X_i$ ,
2.  $S_2$ : the root variables (excluding  $X_i$ ) of each open path between  $X_j$  and  $Y_i$  ( $j$  can be the same as  $i$ ),
3.  $S_3$ : the root variables of this interaction network that are in  $Anc(Y_i)$  and d-separated (by an empty set) from  $X_j$  for all  $j$ ,

such that  $Y_i$  can be expressed as a linear function of the variables in  $S$  i.e.,

$$Y_i = \sum_{W_t \in S} c_{W_t} W_t,$$

where  $c_{W_t}$  is equal to the sum of the values of the directed paths from  $W_t$  to  $Y_i$  that do not go through any variable in  $S$ .

*Proof.* Consider the following protocol.

- Start from the initial structural equation of  $Y_i$ ,  $Y_i = f(Pa(Y_i))$ , denoted  $SE(Y_i)$ .
- For each variable  $A_q$  in the r.h.s. of  $SE(Y_i)$ ,
  - if  $A_q \in S$ , keep it.
  - if  $A_q \notin S$  and not a root of the network, replace it with its structural equation,  $A_q = g(Pa(A_q))$  and plug it into  $SE(Y_i)$ .

- if  $A_q \notin \mathcal{S}$  and is a root of the network, keep it.
- Keep replacing until no more replacement can be done in the r.h.s. of  $SE(Y_i)$ .
- Denote the final  $SE(Y_i)$  as  $SE_f(Y_i)$ .

We prove  $SE_f(Y_i)$  is

$$Y_i = \sum_{W_t \in \mathcal{S}} c_{W_t} W_t,$$

where  $c_{W_t}$  is equal to the sum of the product of path coefficients of the directed paths from  $W_t$  to  $Y_i$  that do not go through any variable in  $\mathcal{S}$ .

First, we prove that the r.h.s. of  $SE_f(Y_i)$  contains only variables in  $\mathcal{S}$ . If it contains a variable,  $A_r \notin \mathcal{S}$ , then  $A_r$  must be a root variable of the network. Otherwise it would have been replaced by its parents according to the protocol.  $A_r \notin \mathcal{S}$ , so  $A_r \notin \mathcal{S}_3$ , hence  $A_r$  must be d-connected (given an empty set) to at least one  $X_j$  for some  $j$ . Since  $A_r$  is a root of the network,  $A_r$  must be the ancestor of  $X_j$ . We next discuss if it is  $X_j$  for  $j = i$  or  $j \neq i$ .

- $j = i$ , i.e.,  $A_r$  is an ancestor of  $X_i$ . Since  $X$  is ASDC,  $X_i$  cannot be caused by a variable belonging to another unit. Hence, we have  $r = i$ . If all directed paths from  $A_r$  to  $Y_i$  pass through variables in  $\mathcal{S}$ , then  $A_r$  cannot be replaced into the r.h.s. of  $SE_f(Y_i)$ . Hence, there exists at least one directed path from  $A_r$  to  $Y_i$  that does not pass through any variable in  $\mathcal{S}$ , which we denote as  $p_d$ . Since  $A_r$  is an ancestor of  $X_i$  and  $A_r$  to  $Y_i$  is a directed path not through  $\mathcal{S}$  (including  $X_i$ ), there exists a confounding path between  $X_i$  and  $Y_i$  through  $A_r$ . Since  $X_i$  and  $Y_i$  are not confounded by only variables of  $i$ ,  $p_d$  must go through a variable of a different unit, and is the root of that confounding path. However, then  $A_r \in \mathcal{S}_2$  by definition, which contradicts the assumption that  $A_r \notin \mathcal{S}$ .
- $j \neq i$ , i.e.,  $A_r$  is an ancestor of  $X_j$  for some  $j \neq i$ . Again, there exists at least one directed path from  $A_r$  to  $Y_i$  that does not pass through any variable in  $\mathcal{S}$ , which we denote as  $p_d$ . Since  $A_r$  is ancestor to both  $X_j$  and  $Y_i$ , there is a confounding path between  $X_j$  and  $Y_i$  through  $A_r$ .  $A_r$  is the root on this path, which implies  $A_r \in \mathcal{S}_3$ , and contradicts the assumption that  $A_r \notin \mathcal{S}$ .

Thus, our counterproof assumption is wrong, which means the r.h.s. of  $SE_f(Y_i)$  generated by the above protocol contains only variables in  $\mathcal{S}$ . Next we prove that the coefficients  $c_{W_t}$  for each  $W_t \in \mathcal{S}$  in the linear combination is equal to the sum of the values of the directed paths from  $W_t$  to  $Y_i$  that do not go through any variable in  $\mathcal{S}$ . In the protocol above, every time a variable is replaced by its parents, there is a multiplier equal to the directed edge between each parent and the variable. For example, in  $SE_{Y_i}$ , a term is  $\gamma C_i$ . If  $C_i$  is replaced by its parents,  $D_j$  and  $E_k$ , where  $C_i = \delta D_j + \theta E_k$ , then the term in  $SE_{Y_i}$  becomes  $\gamma(\delta D_j + \theta E_k)$ . So the coefficient of  $D_j$  is  $C_i$ 's coefficient  $\gamma$  multiplied by  $\delta$ , the edge  $D_j \rightarrow C_i$ . Since replacements of a variable stops if it is in  $\mathcal{S}$ , we have that the final coefficient of a variable is equal to the sum of all directed paths from that variable to  $Y_i$ , which do not pass through any other variable in  $\mathcal{S}$ .  $\square$

**Lemma 6.** Given  $n$  IID random variables  $X_1, \dots, X_n$ , and  $n$  IID random variables  $R_1, \dots, R_n$ . For each  $i$ ,  $R_i$  is not independent of  $X_i$  only. Then we have

$$E \left[ \frac{(X_i - \bar{X})R_i}{\sum_{1 \leq k \leq n} (X_k - \bar{X})^2} \right] = \frac{\beta_{RX}}{n},$$

and  $\beta_{RX}$  is the OLS regression coefficient of  $R$  on  $X$ , treating  $X_1, \dots, X_n$  as a single variable  $X$ , and  $R_1, \dots, R_n$  as a single variable  $R$ .

*Proof.* The above expression only depends on  $i$ , and from the property of IID, it is the same for any  $i$ . We sum over  $i$  for that expression, and get

$$\begin{aligned}
& nE \left[ \frac{(X_i - \bar{X})R_i}{\sum_{1 \leq k \leq n} (X_k - \bar{X})^2} \right] \\
&= \sum_{1 \leq i \leq n} E \left[ \frac{(X_i - \bar{X})R_i}{\sum_{1 \leq k \leq n} (X_k - \bar{X})^2} \right] \\
&= E \left[ \frac{\sum_{1 \leq i \leq n} (X_i - \bar{X})R_i}{\sum_{1 \leq k \leq n} (X_k - \bar{X})^2} \right] \\
&= E \left[ \hat{\beta}_{RX} \right] \\
&= \beta_{RX}.
\end{aligned}$$

Divided by  $n$  on both sides, we have the equation in the lemma.  $\square$

**Lemma 7.** Given  $n$  IID random variables  $X_1, \dots, X_n$ , and  $n$  IID random variables  $R_1, \dots, R_n$ . For each  $i$ ,  $R_i$  is not independent of  $X_i$  only. Then we have

$$E \left[ \frac{(X_i - \bar{X})R_j}{\sum_{1 \leq k \leq n} (X_k - \bar{X})^2} \right] = -\frac{\beta_{RX}}{n(n-1)},$$

for  $i \neq j$ , and  $\beta_{RX}$  is the OLS regression coefficient of  $R$  on  $X$ , treating  $X_1, \dots, X_n$  as a single variable  $X$ , and  $R_1, \dots, R_n$  as a single variable  $R$ .

*Proof.* Denote the expectation of interest as  $E_{ij}$ .  $X$  and  $R$  are both IID regarding different units, and  $X_i$  and  $R_j$  are independent for  $i \neq j$ . Thus,  $E_{ij} = E_{i'j}$ , for any  $i' \neq j$ . Below when the sum is over  $i \neq j$ , it means summing over  $i \in \{1, \dots, n\} \setminus \{j\}$ . We have

$$\begin{aligned}
(n-1)E_{ij} &= \sum_{i \neq j} E_{ij} \\
&= E \left[ \frac{\sum_{i \neq j} (X_i - \bar{X})R_j}{\sum_{1 \leq k \leq n} (X_k - \bar{X})^2} \right] \\
&= E \left[ \frac{\sum_{1 \leq i \leq n} (X_i - \bar{X})R_j - (X_j - \bar{X})R_j}{\sum_{1 \leq k \leq n} (X_k - \bar{X})^2} \right] \\
&= E \left[ \frac{(\sum_{1 \leq i \leq n} (X_i - \bar{X}) - (X_j - \bar{X}))R_j}{\sum_{1 \leq k \leq n} (X_k - \bar{X})^2} \right] \\
&= E \left[ \frac{(0 - (X_j - \bar{X}))R_j}{\sum_{1 \leq k \leq n} (X_k - \bar{X})^2} \right] \\
&= -E \left[ \frac{(X_j - \bar{X})R_j}{\sum_{1 \leq k \leq n} (X_k - \bar{X})^2} \right].
\end{aligned}$$

By Lemma 6, we have

$$(n-1)E_{ij} = -\frac{\beta_{RX}}{n}.$$

Divided by  $(n-1)$  on both sides, we get the equation we wanted to prove.  $\square$

**Lemma 8.** *Given  $n$  IID random variables  $X_1, \dots, X_n$ , and a variable  $L_t$  independent of  $X_1, \dots, X_n$ . Then we have*

$$E \left[ \frac{(X_i - \bar{X})L_t}{\sum_{1 \leq k \leq n} (X_k - \bar{X})^2} \right] = 0.$$

*Proof.* Denote the expectation of interest as  $E_i$ , then  $E_i = E_j$  for any  $i, j$ , since  $X_i$  and  $X_j$  are IID. So we have

$$\begin{aligned} nE_i &= \sum_{1 \leq i \leq n} E_i \\ &= E \left[ \frac{\sum_{1 \leq i \leq n} (X_i - \bar{X})L_t}{\sum_{1 \leq k \leq n} (X_k - \bar{X})^2} \right] \\ &= 0. \end{aligned}$$

$\square$

To prove Theorem 1, we first prove a slightly different version of it, Lemma 9.

**Lemma 9.** *Given the interaction network  $G^*$  of a balanced linear interaction model, with  $X_i$  and  $Y_i$  not confounded by any variable in  $\mathcal{V}_i$ ,  $\forall i$ . Given that  $X$  satisfies ASDC, then the expected value of the OLS estimator  $\hat{\beta}_{YX}$  is given by*

$$\begin{aligned} &E[\hat{\beta}_{YX}] \\ &= \alpha \\ &\quad + \frac{1}{n} \left( \sum_{p \in \mathcal{P}} \text{Val}(p) + \sum_{1 \leq i \leq n} \sum_{R \in (\mathcal{R}[ij] \setminus \{X_i\})} c_R \beta_{RX} \right) \\ &\quad - \frac{1}{n(n-1)} \sum_{1 \leq i \leq n} \sum_{R \in \mathcal{R}[ji]} c_R \beta_{RX}, \end{aligned}$$

where  $\mathcal{P}$  is the set of directed paths from  $X_i$  to  $Y_i$  for all  $i$  through any  $W_j \in \mathcal{V}_{(j)}$  with  $i \neq j$ ,  $\mathcal{R}[iji]$  is the set of roots of the open paths between  $X_i$  and  $Y_i$  through some  $W_j$  with  $j \neq i$ ,  $\mathcal{R}[ji]$  is the set of roots of the open paths between  $X_j$  and  $Y_i$  for  $j \neq i$ , and  $c_R$  is the sum of values of the directed paths from a variable  $R$  ( $\in (\mathcal{R}[iji] \setminus \{X_i\})$  or  $\in \mathcal{R}[ji]$ ) to  $Y_i$  not passing through any variable in  $\mathcal{R}[iji] \cup \mathcal{R}[ji]$  for any  $j \neq i$ .



*Proof.*

$$\begin{aligned}
E[\hat{\beta}_{YX}] &= E \left[ \frac{\sum_{1 \leq i \leq n} (X_i - \bar{X})(Y_i - \bar{Y})}{\sum_{1 \leq i \leq n} (X_i - \bar{X})^2} \right] \\
&= E \left[ \frac{\sum_{1 \leq i \leq n} (X_i - \bar{X})Y_i}{\sum_{1 \leq i \leq n} (X_i - \bar{X})^2} \right] - E \left[ \frac{\sum_{1 \leq i \leq n} (X_i - \bar{X})\bar{Y}}{\sum_{1 \leq i \leq n} (X_i - \bar{X})^2} \right] \\
&= E \left[ \frac{\sum_{1 \leq i \leq n} (X_i - \bar{X})Y_i}{\sum_{1 \leq i \leq n} (X_i - \bar{X})^2} \right] - E \left[ \frac{(\sum_{1 \leq i \leq n} X_i - n\bar{X})\bar{Y}}{\sum_{1 \leq i \leq n} (X_i - \bar{X})^2} \right] \\
&= E \left[ \frac{\sum_{1 \leq i \leq n} (X_i - \bar{X})Y_i}{\sum_{1 \leq i \leq n} (X_i - \bar{X})^2} \right] - E \left[ \frac{(n\bar{X} - n\bar{X})\bar{Y}}{\sum_{1 \leq i \leq n} (X_i - \bar{X})^2} \right] \\
&= E \left[ \frac{\sum_{1 \leq i \leq n} (X_i - \bar{X})Y_i}{\sum_{1 \leq i \leq n} (X_i - \bar{X})^2} \right]
\end{aligned}$$

$Y_i$  is can be written as a linear combination of the set in Lemma 5,  $\mathcal{S}$ . By Lemma 5,  $\mathcal{S}$  is composed of

1.  $X_i$ ,
2. the root variables (excluding  $X_i$ ) of each open path between  $X_j$  and  $Y_i$ , and
3. the root variables of this interaction network that are in  $Anc(Y_i)$  and d-separated (by an empty set) from  $X_j$  for all  $j$ , denoted by  $\mathcal{L}_i$ .

The second component can be further divided into two sub-components as follows.

1.  $\mathcal{R}[iji] \setminus \{X_i\}$ , the set of roots of the open paths between  $X_i$  and  $Y_i$  through some  $W_j$  with  $j \neq i$ , with  $X_i$  excluded, and
2.  $\mathcal{R}[ji]$ , the set of roots of the open paths between  $X_j$  and  $Y_i$  for  $i \neq j$ .

We have

$$Y_i = c_i X_i + \sum_{R \in (\mathcal{R}[iji] \setminus \{X_i\})} c_R R + \sum_{R \in \mathcal{R}[ji]} c_R R + \sum_{L \in \mathcal{L}_i} c_L L,$$

where  $c_i$ ,  $c_R$ , and  $c_L$  denote coefficients for the linear combination. The variables in the above expression are  $\mathcal{S}$ , i.e.,  $\mathcal{S} = \mathcal{R}[iji] \cup \mathcal{R}[ji] \cup \mathcal{L}_i$ . Next, we compute the coefficients  $c_i$ ,  $c_R$ ,  $c_L$ .

$c_i$  is the sum of the directed path values from  $X_i$  to  $Y_i$  not passing through any variable in  $\mathcal{S}$ . There are three types of directed paths from  $X_i$  to  $Y_i$ :

1. the directed edge  $X_i \rightarrow Y_i$ ,
2. directed paths  $X_i \rightarrow \dots \rightarrow V_i \rightarrow \dots \rightarrow Y_i$ , and
3. directed paths  $X_i \rightarrow \dots \rightarrow V_j \rightarrow \dots \rightarrow Y_i$  for  $j \neq i$ .

The first two types belong to TACE by definition. So  $c_i = \alpha + c_{i3}$ , where  $c_{i3}$  is the coefficient contributed by the third type of directed paths. Note that  $V_j$  cannot be a root of another path between  $X_k$  and  $Y_l$  for some  $k \neq l$ . This is because  $V_j$  is caused by  $X_i$ , so  $V$  cannot be ASDC, so  $X$  cannot be ASDC since  $X_k$  is caused by  $V_j$ , which violates the assumption that  $X$  is ASDC. Hence,  $c_{i3}$  is equal to the sum of all directed paths from  $X_i$  to  $Y_i$  through some variable  $V_j$  for any  $j$ , which is equal to  $\sum_{p \in \mathcal{P}}$  in the lemma statement.

For the second and third components in  $Y_i$ , each  $c_R$  is the sum of the directed paths (multiplications of edge coefficients) from  $R$  to  $Y_i$  not through variables in  $\mathcal{S}$ . This follows from Lemma 5.

We have

$$\begin{aligned}
& E[\hat{\beta}_{YX}] \\
&= E \left[ \frac{\sum_{1 \leq i \leq n} (X_i - \bar{X}) Y_i}{\sum_{1 \leq i \leq n} (X_i - \bar{X})^2} \right] \\
&= E \left[ \frac{\sum_{1 \leq i \leq n} (X_i - \bar{X}) (c_i X_i + \sum_{R \in (\mathcal{R}[ij] \setminus \{X_i\})} c_R R + \sum_{R \in \mathcal{R}[ji]} c_R R + \sum_{L \in \mathcal{L}_i} c_L L)}{\sum_{1 \leq i \leq n} (X_i - \bar{X})^2} \right] \\
&= \alpha E \left[ \frac{\sum_{1 \leq i \leq n} (X_i - \bar{X}) X_i}{\sum_{1 \leq i \leq n} (X_i - \bar{X})^2} \right] + E \left[ \frac{\sum_{1 \leq i \leq n} (X_i - \bar{X}) c_{i3} X_i}{\sum_{1 \leq i \leq n} (X_i - \bar{X})^2} \right] \\
&\quad + \sum_{1 \leq i \leq n} \sum_{R \in (\mathcal{R}[ij] \setminus \{X_i\})} c_R E \left[ \frac{(X_i - \bar{X}) R}{\sum_{1 \leq i \leq n} (X_i - \bar{X})^2} \right] \\
&\quad + \sum_{1 \leq i \leq n} \sum_{R \in \mathcal{R}[ji]} c_R E \left[ \frac{(X_i - \bar{X}) R}{\sum_{1 \leq i \leq n} (X_i - \bar{X})^2} \right] + \sum_{1 \leq i \leq n} \sum_{L \in \mathcal{L}_i} c_L E \left[ \frac{(X_i - \bar{X}) L}{\sum_{1 \leq i \leq n} (X_i - \bar{X})^2} \right].
\end{aligned}$$

For the first term: similar to the way  $\bar{Y}$  is removed before, in the first term, we can change  $X_i$  to  $X_i - \bar{X}$ . The numerator and the denominator are the same in the expectation. So the first term is  $\alpha$ .

The second term is equal to

$$\sum_{1 \leq i \leq n} c_{i3} E \left[ \frac{(X_i - \bar{X}) X_i}{\sum_{1 \leq i \leq n} (X_i - \bar{X})^2} \right].$$

By Lemma 6, it becomes

$$\sum_{1 \leq i \leq n} c_{i3} \frac{\beta_{XX}}{n},$$

where  $c_{i3}$  is the sum of directed paths from  $X_i$  to  $Y_i$  through  $V_j$  for any  $j \neq i$  and any  $V$ .

For the third term: we look at one single  $R$  first.  $R$  is the root variable of an open path between  $X_i$  and  $Y_i$  through some  $W_j$  with  $j \neq i$ , so  $R$  causes  $X_i$ . Then  $R$  must belong to unit  $i$  since  $X$  satisfies ASDC. Since  $R$  is the root,  $R \in \text{Anc}(X)$ , so  $R$  satisfies ASDC, and is IID for different units. So we relabel this  $R$  as  $R_i$ , and we have IID  $R_1, \dots, R_n$ . Applying Lemma 6, we have the expectation term is equal to  $\beta_{RX}/n$ .  $c_R$  is the sum of the directed paths from  $R_i$  to  $Y_i$ , not through variables in  $\mathcal{S}$ . So the third term is equal to

$$\frac{1}{n} \sum_{1 \leq i \leq n} \sum_{R \in (\mathcal{R}[ij] \setminus \{X_i\})} c_R \beta_{RX}.$$

For the fourth term: we look at one single  $R$  first.  $R$  is the root variable of an open path between  $X_j$  and  $Y_i$ , for some  $j \neq i$ , so either  $R$  causes  $X_j$  or  $R = X_j$ . If  $R$  causes  $X_j$ , then  $R$  must belong to unit  $j$ , because  $X$  satisfies ASDC. So either case  $R$  belongs to unit  $j$ . Since  $R$  is the root,  $R \in \text{Anc}(X)$ , so  $R$  satisfies ASDC, and is IID for different units. So we relabel this  $R$  as  $R_j$ , and we have IID  $R_1, \dots, R_n$ . Applying Lemma 7, we have the expectation term is equal to  $-\beta_{RX}/(n(n-1))$ .  $c_R$  is the sum of the directed paths from  $R_j$  to  $Y_i$ , not through variables in  $\mathcal{S}$ . So the fourth term is equal to

$$-\frac{1}{n(n-1)} \sum_{1 \leq i \leq n} \sum_{R \in \mathcal{R}[ji]} c_R \beta_{RX}.$$

The fifth term is 0 by Lemma 4.

Finally, recall that  $Val(p)$  denotes the value of an open path  $p$ . Plugging the above values back into the expression for  $E[\hat{\beta}_{YX}]$ , we have the results as in Lemma 9.  $\square$
